# Supplementary material for: SERR Spectroelectrochemistry as a Guide for Rational Design of DyP-Based Bioelectronics Devices
Source: MDPI journal article supplement (doi:10.3390/ijms22157998), 2021-07-27
Supplement: s1 [file s1]

## SUPPLEMENTARY MATERIAL

### SERR spectroelectrochemistry as a guide for rational design of DyP based bioelectronics devices

Lidia Zuccarello, Catarina Barbosa, Edilson Galdino, Nikola Lončar, Célia M. Silveira, Marco W. Fraaije, Smilja Todorovic

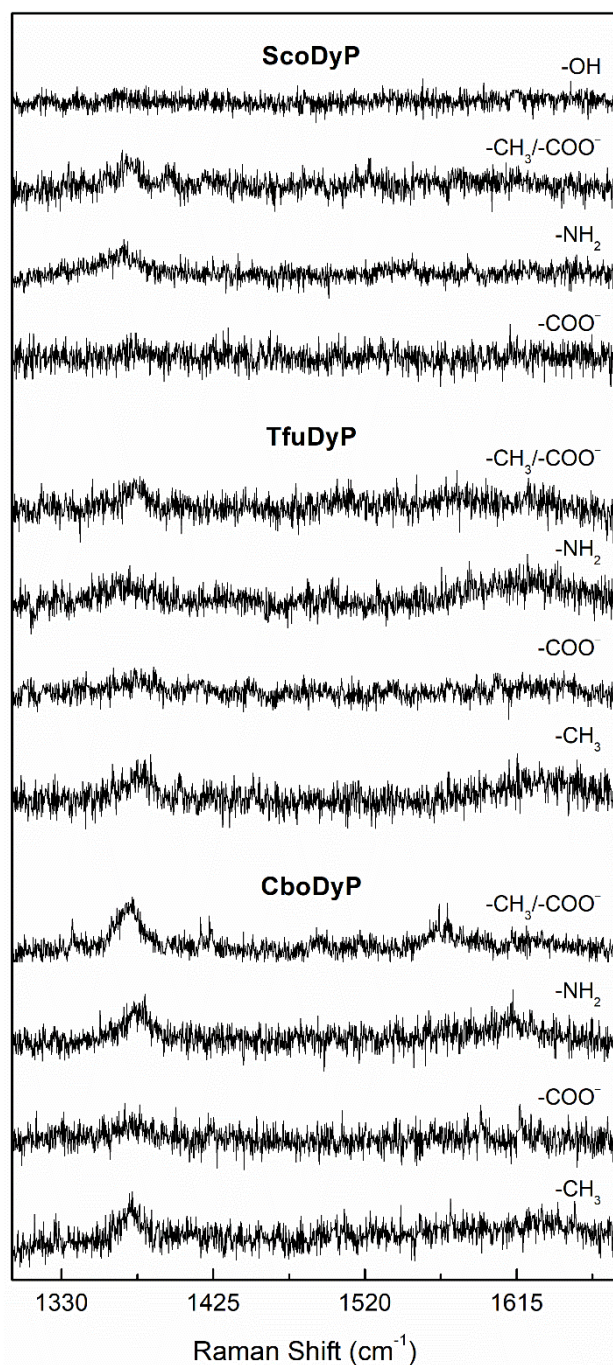

**Figure S1.** SERR spectra of ferric ScoDyP, TfuDyP and CboDyP immobilised on Ag electrodes coated with pure and mixed alkanethiol ( $\text{HS}(\text{CH}_2)_n\text{-X}$ ,  $\text{X} = \text{OH}$ ,  $\text{CH}_3$ ,  $\text{COO}^-$  and  $\text{NH}_2$ ) SAMs. All spectra were acquired with 405 nm excitation at 21 °C, pH 7.

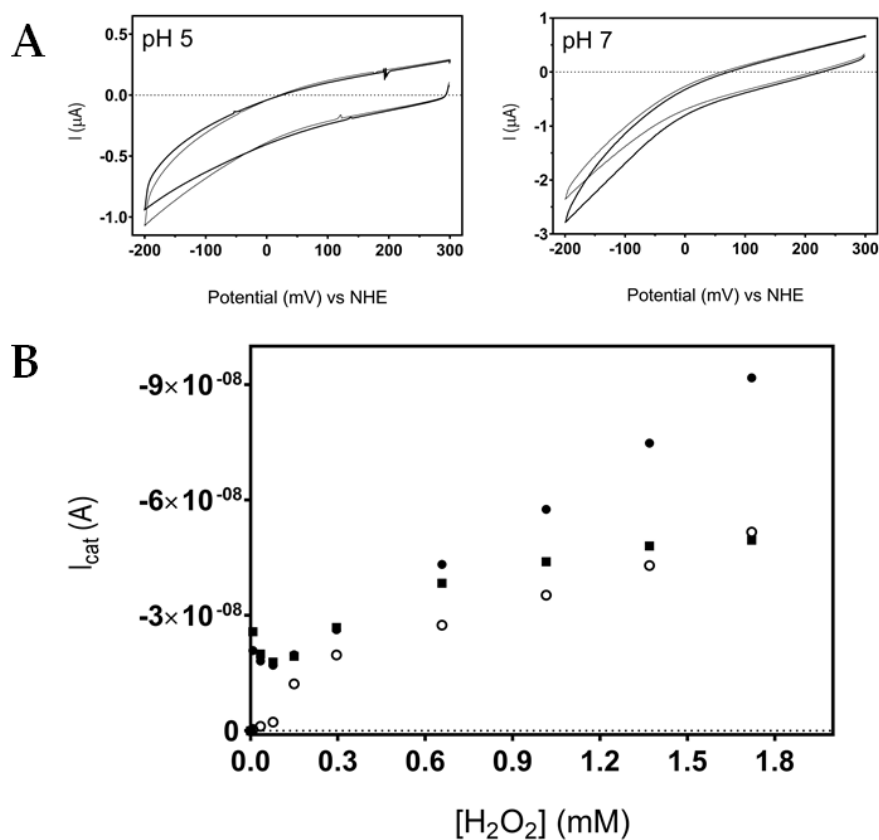

**Figure S2.** Electrochemical response of CboDyP immobilised on Ag electrodes coated with 1-undecanethiol : 11-amino-1-undecanethiol hydrochloride (M:M, 2:1) SAMs. **(A)** Cyclic voltammograms in absence (thin line) or presence (thick line) of  $\text{H}_2\text{O}_2$ , 0.7 mM, measured at pH 5 (Britton-Robinson 40 mM, KCl 50 mM) and pH 7 (KPi 12.5 mM,  $\text{K}_2\text{SO}_4$  12.5 mM). **(B)** Plots of catalytic current ( $I_{\text{cat}}$ ) vs.  $\text{H}_2\text{O}_2$  concentration for CboDyP-loaded electrodes (full circles and full squares) and for control electrodes without enzyme (open circles); currents were measured by amperometry at  $-100$  mV vs. NHE, pH 7.
